# Supplementary material for: Amino Acid Biosignature in Plasma among Ischemic Stroke Subtypes
Source: Hindawi journal article supplement (doi:10.1155/2019/8480468), 2019-01-20
Supplement: f1 [file 8480468.f1.pdf]

207 **Supplementary tables**

208 **Table S1.** Retention time, ions (m/z) and specific abundance for each amino acid

| Nº | Amino acids     | Retention time<br>in minutes* | Identification ions (m/z) and<br>abundance (%) | Quantitation ions<br>(m/z) |
|----|-----------------|-------------------------------|------------------------------------------------|----------------------------|
| 1  | L-Alanine       | 8.51±0.03                     | 116(100)+73(53.6)                              | 116                        |
| 2  | L-Glycine       | 9.35±0.03                     | 102(100)+73(68.4)                              | 102                        |
| 3  | Sarcosine       | 12.22±0.02                    | 116(100)+73(52.0)                              | 116                        |
| 4  | L-Valine        | 12.29±0.02                    | 144(100)+73(40.6)                              | 144                        |
| 5  | L-Leucine       | 14.40±0.02                    | 158(100)+73(42.4)                              | 158                        |
| 6  | L-Isouleucine   | 15.25±0.02                    | 158(100)+73(50.4)                              | 158                        |
| 7  | L-Serine        | 17.60±0.02                    | 73(100)+204(75.2)                              | 204                        |
| 8  | L-Threonine     | 21.83±0.02                    | 73(100)+218(46.0)                              | 218                        |
| 9  | L-Methionine    | 21.9±0.02                     | 176(100)+128(60.0)                             | 176                        |
| 10 | L-Aspartic acid | 20.24±0.02                    | 73(100)+232(68.4)                              | 232                        |
| 11 | L-Proline       | 21.15±0.02                    | 156(100)+73(53.6)                              | 156                        |
| 12 | L-Cysteine      | 22.15±0.02                    | 73(100)+220(88.8)                              | 220                        |
| 13 | L-Glutamic acid | 22.99±0.03                    | 246(100)+128(32.4)                             | 246                        |
| 14 | L-Phenylalanine | 23.00±0.02                    | 218(100)+192(71.2)                             | 218                        |
| 15 | L-Asparagine    | 23.75±0.03                    | 116(92.40)+231(51.2)                           | 231                        |
| 16 | L-Lysine        | 24.45±0.03                    | 84(100)+156(55.6)                              | 156                        |

209 \*Mean ± standard deviation (n=10). Adapted from de Paiva *et al.*, 2013

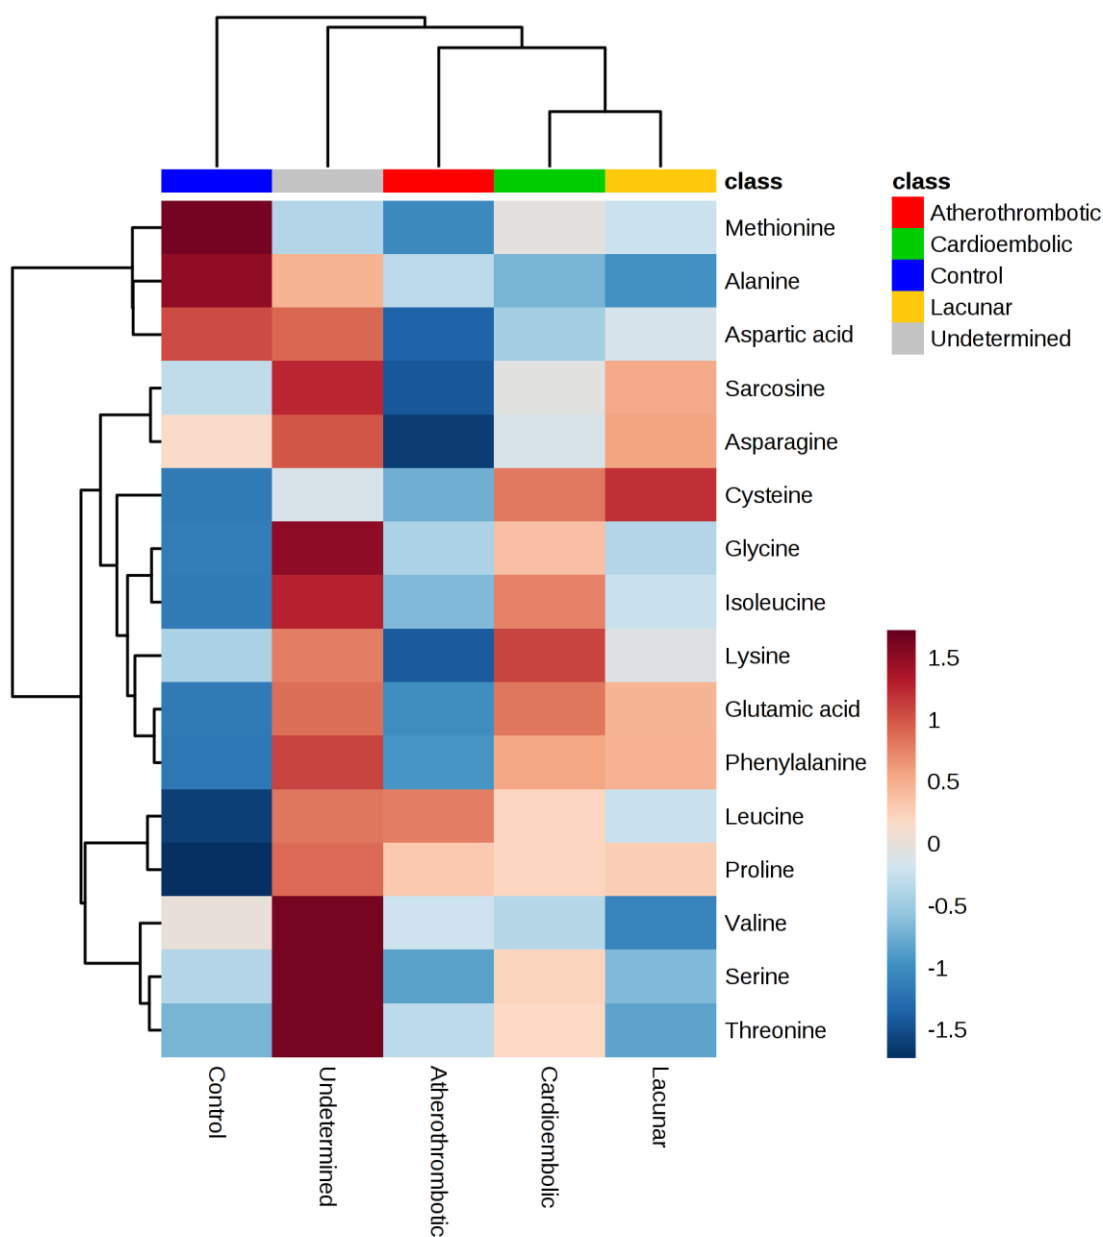

**Figure S1. Heatmap of the ischemic stroke amino acid dataset.** The colors represent the concentration of metabolites. The subtypes of ischemic stroke and controls are represented in horizontal axis and amino acids in vertical axis; and are separated using hierarchical clustering (Ward's algorithm), with the dendrogram being scaled to represent the distance between each branch (distance measure: Euclidean). The contrast in the average concentrations of metabolites between the group of patients with stroke and healthy individuals are being presented.
